# Supplementary material
Source: publisher site journal article supplement (https://www.dovepress.com/get_supplementary_file.php?f=478594.docx)
Supplement: Supplementary file 1 [file get_supplementary_file.php]

| **Table S1**   **Baseline demographics and cycle characteristics of the study cohort.** | | | | | | | |  |  |
| --- | --- | --- | --- | --- | --- | --- | --- | --- | --- |
|  | ***Escherichia***  ***coli*** | ***Streptococcus***  ***agalactiae*** | ***Proteus***  ***mirabilis*** | ***Enterococcus***  ***faecalis*** | ***Streptococcus***  ***mitis*** | ***Klebsiella***  ***pneumoniae*** | ***Enterobacter***  ***cloacae*** | ***Uncontaminated embryos***  ***from*** ***IVF cycles in the same period*** | ***P*-**  **values** |
| **No. of cycles** | 20 | 7 | 4 | 3 | 2 | 2 | 1 | 31268 |  |
| **Female Age (years，(mean ± SD)** | 32.75±5.41 | 32.57±3.36 | 32.75±1.50 | 32.00±4.36 | 33.00±1.41 | 33.00±0.00 | 31 | 33.08±6.81 | 0.9999 |
| **Male Age (years，(mean ± SD)** | 34.20±5.22 | 33.43±5.83 | 33.75±3.87 | 35.67±0.58 | 34.50±2.12 | 35.00±0.00 | 31 | 34.33±7.10 | 0.9894 |
| **BMI (kg/m2，(mean ± SD)** | 21.32±2.33 | 21.82±1.73 | 21.68±1.20 | 21.81±1.58 | 22.05±0.72 | 20.32±0.81 | 20.75 | 22.76±3.62 | 0.7844 |
| **Type of infertility** |  |  |  |  |  |  |  |  |  |
| **Primary infertility, n (%)** | 12(60.00%) | 4(57.14%) | 4(100.00%) | 1(33.33%) | 0(0.00%) | 1(50.00%) | 0(0.00%) | 15365(49.14%) | 0.2937 |
| **Secondary infertility, n (%)** | 8(40.00%) | 3(42.86%) | 0(0.00%) | 2(66.67%) | 2(100.00%) | 1(50.00%) | 1(100.00%) | 15903(50.86%) | 0.2937 |
| **Infertility duration (years，(mean ± SD)** | 5.20±4.15 | 5.14±1.68 | 5.50±1.00 | 5.00±1.00 | 6.00±1.49 | 5.00±1.24 | 5.50 | 5.31±4.46 | 0.9999 |
| **Reasons of infertility** |  |  |  |  |  |  |  |  |  |
| **Female factor, n (%)** | 5(25.00%) | 5(71.43%) | 3(75.00%) | 0(0.00%) | 1(50.00%) | 1(50.00%) | 0(0.00%) | 15054(48.15%) | 0.1124 |
| **Male factor, n (%)** | 0(0.00%) | 0(0.00%) | 0(0.00%) | 0(0.00%) | 0(0.00%) | 0(0.00%) | 0(0.00%) | 26(0.08%) | 0.9999 |
| **Multiple factors, n (%)** | 10(50.00%) | 2(28.57%) | 1(25.00%) | 3(100.00%) | 1(50.00%) | 0(0.00%) | 0(0.00%) | 9394(30.04%) | 0.0856 |
| **Unexplained infertility, n (%)** | 5(25.00%) | 0(0.00%) | 0(0.00%) | 0(0.00%) | 0(0.00%) | 1(50.00%) | 1(10.00%) | 6794(21.73%） | 0.5698 |
| **Stimulation protocols** |  |  |  |  |  |  |  |  |  |
| **No of receiving long agonist protocol, n (%)** | 10(50.00%) | 3(42.86%) | 0(0.00%) | 1(33.33%) | 0(0.00%) | 1(50.00%) | 0(0.00%) | 11897(38. 05%) | 0.5717 |
| **No of receiving antagonist protocol, n (%)** | 10(50.00%) | 4(57.14%) | 4(100.00%) | 2(66.67%) | 2(100.00%) | 1(50.00%) | 1(100.00%) | 16081(51.43%) | 0.4295 |
| **No of receiving short agonist protocol, n (%)** | 0(0.00%) | 0(0.00%) | 0(0.00%) | 0(0.00%) | 0(0.00%) | 0(0.00%) | 0(0.00%) | 3290(10.52%) | 0.7104 |

Table legend: Baseline demographics and cycle characteristics of the study cohort are shown in Table 7. No significant differences were observed in age, BMI, type of infertility, infertility duration, and stimulation protocols between the groups. BMI=Body Mass Index.
